# Supplementary material
Source: PubMed Central journal article supplement (PMC3437591)
Supplement: mt2012127x1.pdf [file mt2012127x1.pdf]

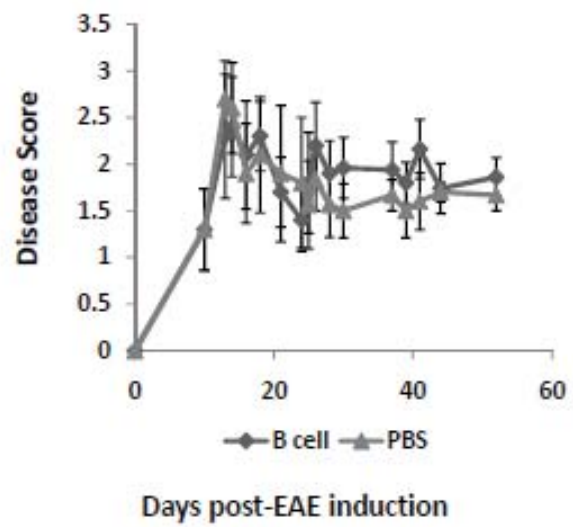

Figure S1. Wild-type C57/B6 mice were MOG – immunized at day 0.  $1 \times 10^6$  WT B cells or PBS were given at day 11 and 15. Disease progression in both groups were monitored twice per week
