# Supplementary material
Source: PubMed Central journal article supplement (PMC3437591)
Supplement: mt2012127x2.pdf [file mt2012127x2.pdf]

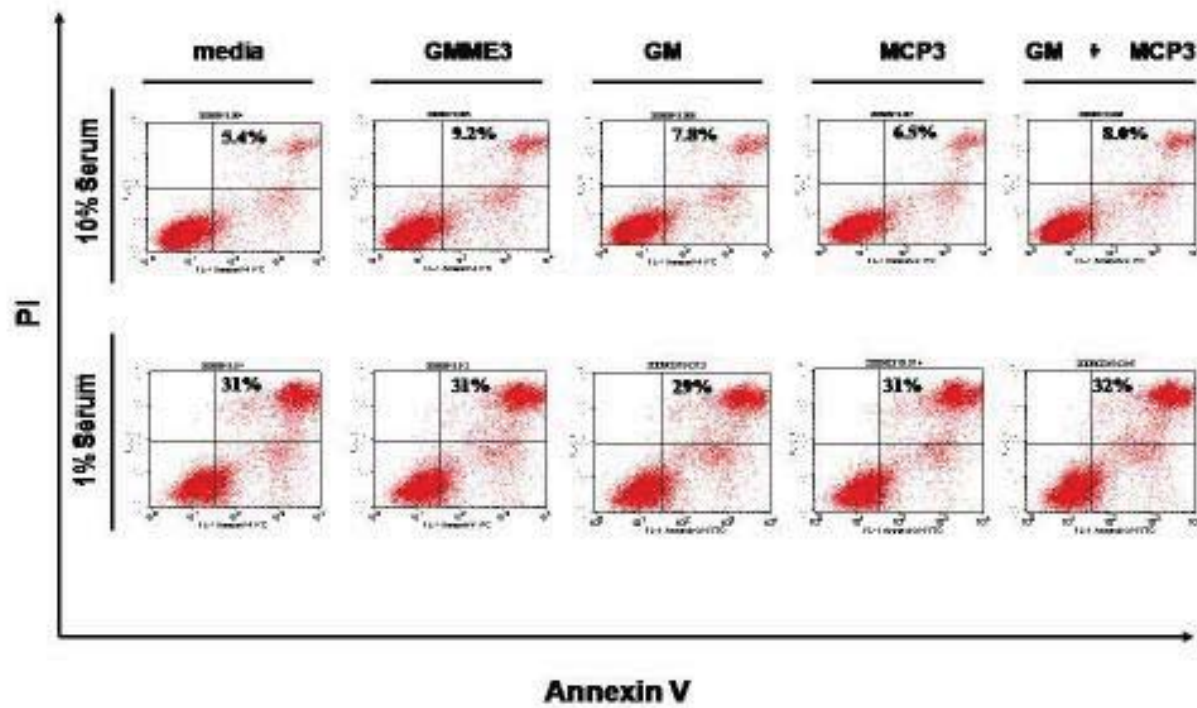

Figure S2. GMME3 have no enhanced pro-apoptotic activity. EL4 lymphoid cells were cultured in 10% or 1% serum medium and treated with GMME3 or cytokine controls for the last 48 hours of culture. % apoptotic cells were confirmed by PI-Annexin V staining and indicated using flow cytometric analysis.
